# Supplementary material
Source: PubMed Central journal article supplement (PMC11034959)
Supplement: 8518_Appendix.pdf [file 8518_Appendix.pdf]

(6) Today's curriculum was beneficial to my ability to work with a team.

|          |                      |         |                   |       |
|----------|----------------------|---------|-------------------|-------|
| Disagree | Somewhat<br>Disagree | Neutral | Somewhat<br>Agree | Agree |
|----------|----------------------|---------|-------------------|-------|

(7) I would recommend today's curriculum to my peers.

|          |                      |         |                   |       |
|----------|----------------------|---------|-------------------|-------|
| Disagree | Somewhat<br>Disagree | Neutral | Somewhat<br>Agree | Agree |
|----------|----------------------|---------|-------------------|-------|

(8) Today's curriculum was intellectually challenging.

|          |                      |         |                   |       |
|----------|----------------------|---------|-------------------|-------|
| Disagree | Somewhat<br>Disagree | Neutral | Somewhat<br>Agree | Agree |
|----------|----------------------|---------|-------------------|-------|

(9) Today's curriculum increased my knowledge of the subject matter.

|          |                      |         |                   |       |
|----------|----------------------|---------|-------------------|-------|
| Disagree | Somewhat<br>Disagree | Neutral | Somewhat<br>Agree | Agree |
|----------|----------------------|---------|-------------------|-------|

(10) Today's curriculum provided me with the opportunity to practice the skills taught in the course.

|          |                      |         |                   |       |
|----------|----------------------|---------|-------------------|-------|
| Disagree | Somewhat<br>Disagree | Neutral | Somewhat<br>Agree | Agree |
|----------|----------------------|---------|-------------------|-------|

(11) Today's curriculum improved my problem-solving skills.

|          |                      |         |                   |       |
|----------|----------------------|---------|-------------------|-------|
| Disagree | Somewhat<br>Disagree | Neutral | Somewhat<br>Agree | Agree |
|----------|----------------------|---------|-------------------|-------|

Additional comments/feedback? \_\_\_\_\_

---

---

Is there anything not reviewed in today's session that would be useful to incorporate in future versions or for Career Exploration Week? \_\_\_\_\_

---

---
